# Supplementary material for: Molecular Determinants of the Kinetic Binding Properties of Antihistamines at the Histamine H1 Receptors
Source: Int J Mol Sci. 2021 Feb 27;22(5):2400. doi: 10.3390/ijms22052400 (PMC7957501; doi:10.3390/ijms22052400)
Supplement: Supplementary file 1 [file ijms-22-02400-s001.csv]

AM1_dipole
AM1_E
AM1_HF
AM1_HOMO
AM1_LUMO
ASA+
ASA-
ASA_H
ast_violation
ast_violation_ext
a_acc
a_aro
a_don
a_ICM
a_nN
BCUT_PEOE_0
BCUT_PEOE_1
BCUT_PEOE_2
BCUT_PEOE_3
BCUT_SLOGP_0
BCUT_SLOGP_1
BCUT_SLOGP_2
BCUT_SMR_1
BCUT_SMR_2
b_1rotN
b_1rotR
b_double
b_max1len
DASA
dens
dipole
E
E_ang
E_ele
E_oop
E_sol
E_str
E_strain
E_tor
E_vdw
FASA+
FASA_H
GCUT_PEOE_0
GCUT_PEOE_1
GCUT_PEOE_2
GCUT_SLOGP_0
GCUT_SLOGP_1
GCUT_SLOGP_2
GCUT_SMR_0
GCUT_SMR_2
glob
h_ema
h_emd
h_emd_C
h_logD
h_logP
h_logS
h_log_pbo
h_pavgQ
h_pKa
h_pstates
h_pstrain
lip_acc
logP(o/w)
MNDO_dipole
MNDO_HOMO
MNDO_LUMO
npr1
npr2
opr_brigid
PEOE_RPC+
PEOE_RPC-
PEOE_VSA+0
PEOE_VSA+1
PEOE_VSA+2
PEOE_VSA+5
PEOE_VSA-0
PEOE_VSA-1
PEOE_VSA-5
PEOE_VSA_FHYD
PEOE_VSA_FNEG
PEOE_VSA_POS
petitjean
pmi1
Q_RPC+
Q_VSA_FHYD
Q_VSA_FNEG
Q_VSA_FPNEG
Q_VSA_FPPOS
Q_VSA_POS
Q_VSA_PPOS
rsynth
SlogP
SlogP_VSA0
SlogP_VSA1
SlogP_VSA3
SlogP_VSA4
SlogP_VSA5
SlogP_VSA6
SlogP_VSA7
SlogP_VSA8
SlogP_VSA9
SMR_VSA0
SMR_VSA1
SMR_VSA2
SMR_VSA3
SMR_VSA4
SMR_VSA7
std_dim2
std_dim3
vsa_acc
vsa_other
vsurf_A
vsurf_CP
vsurf_CW1
vsurf_CW2
vsurf_CW3
vsurf_CW4
vsurf_CW7
vsurf_CW8
vsurf_D7
vsurf_D8
vsurf_DD12
vsurf_DD13
vsurf_DW12
vsurf_DW23
vsurf_EDmin1
vsurf_EWmin1
vsurf_HB1
vsurf_ID1
vsurf_ID6
vsurf_ID7
vsurf_ID8
vsurf_IW1
vsurf_IW2
vsurf_IW3
vsurf_IW4
vsurf_IW5
vsurf_IW6
vsurf_IW7
vsurf_IW8
vsurf_R
vsurf_Wp3
